# Supplementary material for: Enantiomerically-enriched organic reagents via polymer synthesis: enantioselective copolymerization of cycloalkene oxides and CO2 using homogeneous, zinc-based catalysts
Source: Royal Society of Chemistry journal article supplement (doi:10.1039/b005537i), 2000-01-01
Supplement: b005537ia.doc [file b005537ia.doc]

Fig. 1 Molecular structure of **3e**. Selected bond distances (Å) and angles (°): Zn(1)-N(1) 1.955(3); Zn(1)-N(2) 1.963(3); Zn(1)-N(3) 1.883(3); N(1)-Zn(1)-Zn(2) 96.96(13); N(2)-Zn(1)-N(3) 137.77(13); N(1)-Zn(1)-N(3) 124.87(13); N(1)-Zn(1)-N(3)-Si(1) 46.64(0.26).
